# Supplementary material for: Pacific oceanic front amplifies the impact of Atlantic oceanic front on North Atlantic blocking
Source: Springer Nature journal article supplement (doi:10.1038/s41612-023-00370-x), 2023-06-06
Supplement: 41612_2023_370_MOESM1_ESM.pdf [file 41612_2023_370_MOESM1_ESM.pdf]

**Supplementary Material for**  
**Pacific Oceanic Front Amplifies the Impact of Atlantic Oceanic Front on**  
**North Atlantic Blocking**

Ho-Nam Cheung<sup>1,2,3#</sup>, Nour-Eddine Omrani<sup>3,4#</sup>, Fumiaki Ogawa<sup>5</sup>, Noel

Keenlyside<sup>3,4,6,7</sup>, Hisashi Nakamura<sup>8</sup>, Wen Zhou<sup>9</sup>

1. *School of Atmospheric Sciences & Southern Marine Science and Engineering Guangdong Laboratory (Zhuhai), Zhuhai, China, Sun Yat-sen University, Zhuhai, China*
2. *Guangdong Province Key Laboratory for Climate Change and Natural Disaster Studies*
3. *Bjerknes Centre for Climate Research, University of Bergen, Bergen, Norway*
4. *Geophysical Institute, University of Bergen, Bergen, Norway*
5. *Graduate School of Science, Hokkaido University, Japan*
6. *Nansen Environmental and Remote Sensing Center, Bergen, Norway*
7. *A.M. Obukhov Institute of Atmospheric Physics, RAS, Moscow, Russia*
8. *Research Center for Advanced Science and Technology, The University of Tokyo, Tokyo, Japan*
9. *Department of Atmospheric and Oceanic Sciences & Institute of Atmospheric Sciences, Fudan University, Shanghai, China*

**Contents**

Supplementary Figures 1–10

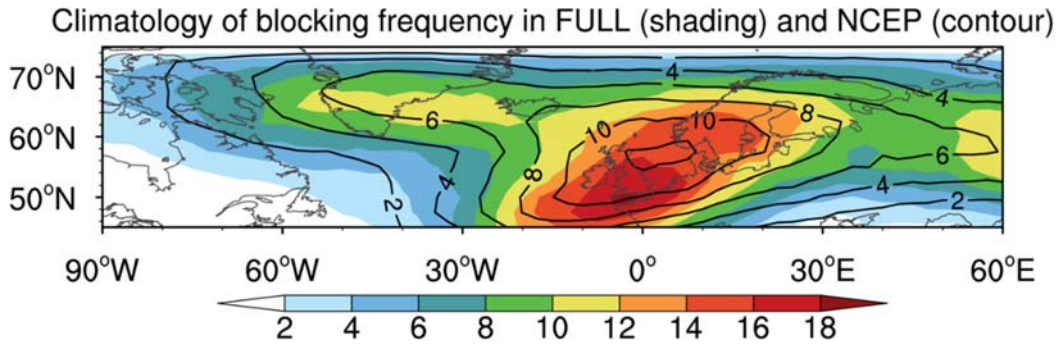

1

2 **Supplementary Figure. 1. Ability of the MAECHAM5 atmospheric model to**  
3 **simulate the winter climatology of blocking frequency.** Comparison of the  
4 climatology of winter (December-January-February; DJF) blocking frequency in the  
5 FULL run (prescribing realistic SST in the Northern Hemisphere and tropics; shading)  
6 and in the NCEP/NCAR reanalysis datasets (contours). Unit: %.

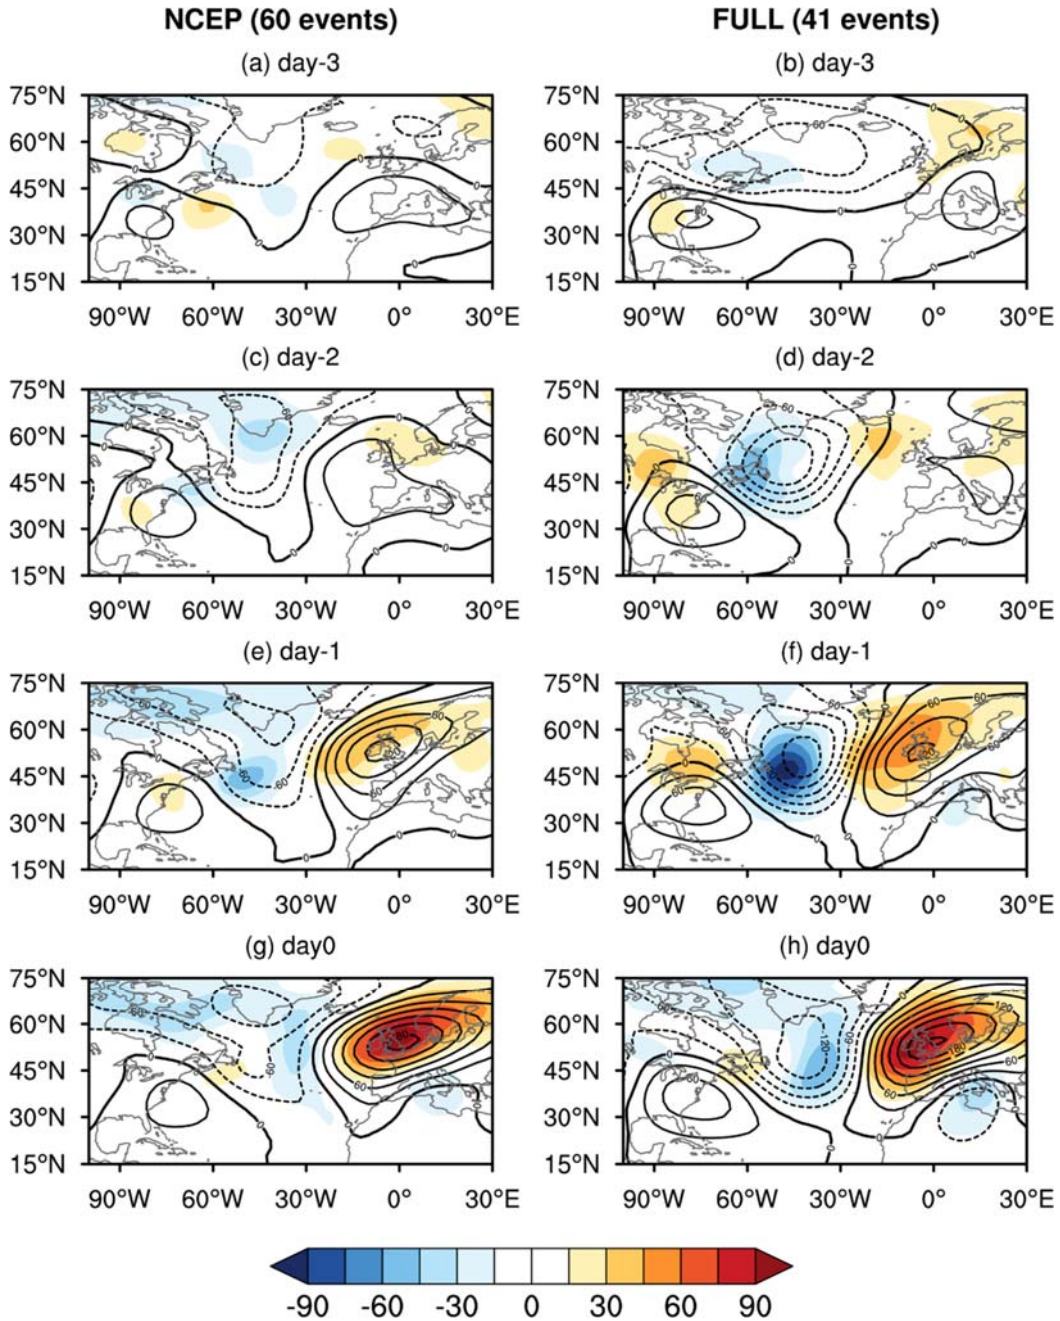

7

8 **Supplementary Figure. 2. Ability of the MAECHAM5 atmospheric model to**  
 9 **simulate the development of Euro-Atlantic blocking.** Comparison of the 500-hPa  
 10 geopotential height anomaly (contour interval: 30 m) and tendency (shading: m) during  
 11 day-4 to day+0 of Euro-Atlantic blocking (45°–55°N and 10°W–10°E) between (left  
 12 panel) the NCEP/NCAR reanalysis datasets and (right panel) the FULL run: (a)–(b)  
 13 day-3, (c)–(d) day-2, (e)–(f) day-1, (g)–(h) day+0, where day+0 is the onset of  
 14 blocking.

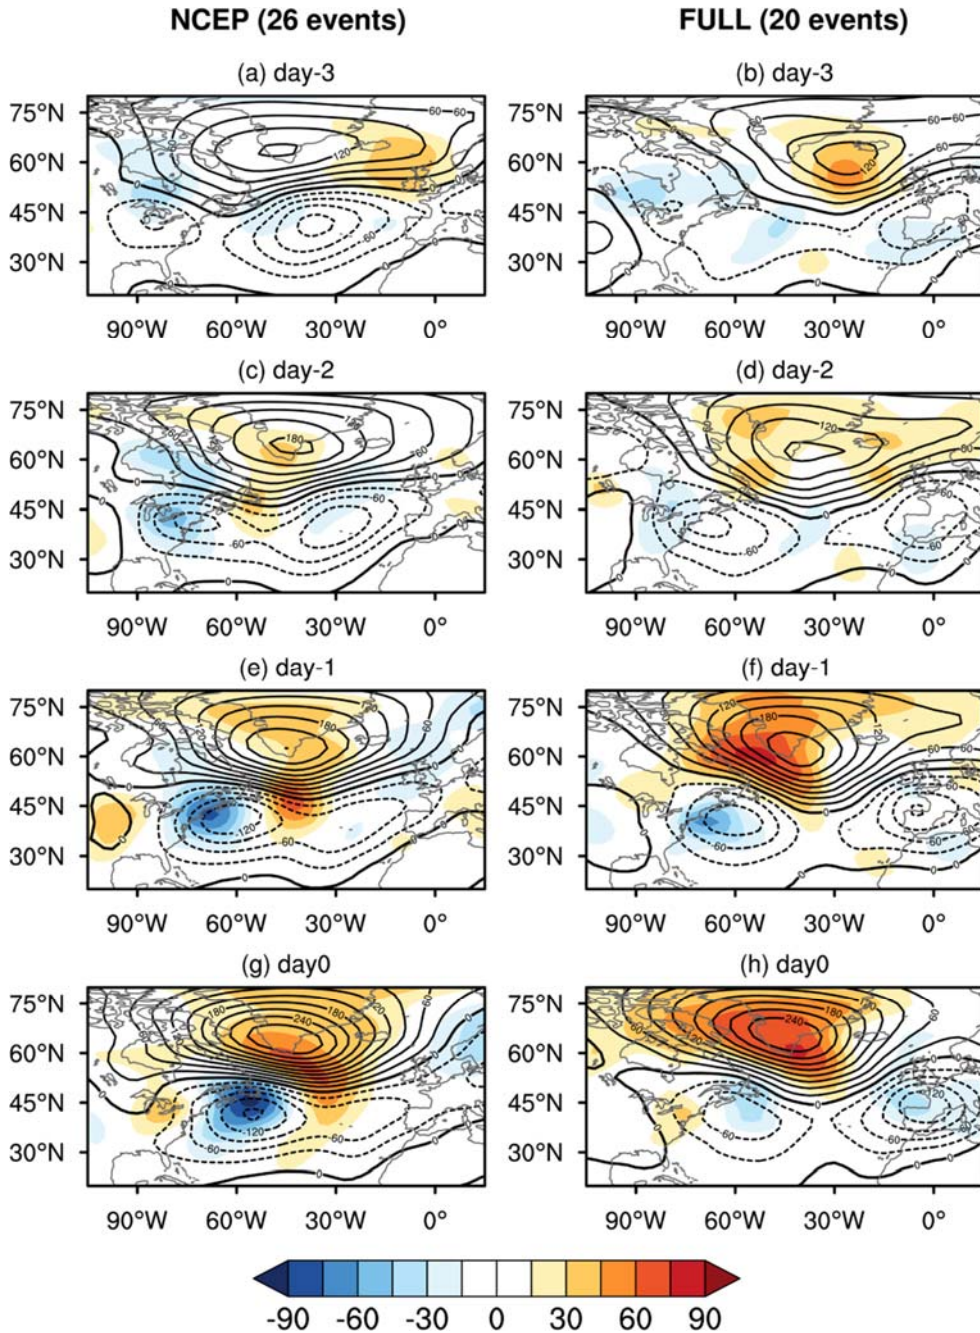

15

16 **Supplementary Figure. 3. Ability of the MAECHAM5 atmospheric model to**  
 17 **simulate the development of Greenland blocking.** Comparison of the 500-hPa  
 18 geopotential height anomaly (contour interval: 30 m) and tendency (shading: m  
 19 during day-4 to day+0 of Greenland blocking (60°–70°N and 60°–30°W) between (left panel)  
 20 the NCEP/NCAR reanalysis and (right panel) the FULL run: (a)–(b) day-3, (c)–(d)  
 21 day-2, (e)–(f) day-1, (g)–(h) day+0, where day+0 is the onset of blocking.

### Euro-Atlantic blocking (45°-55°N, 10°W-10°E)

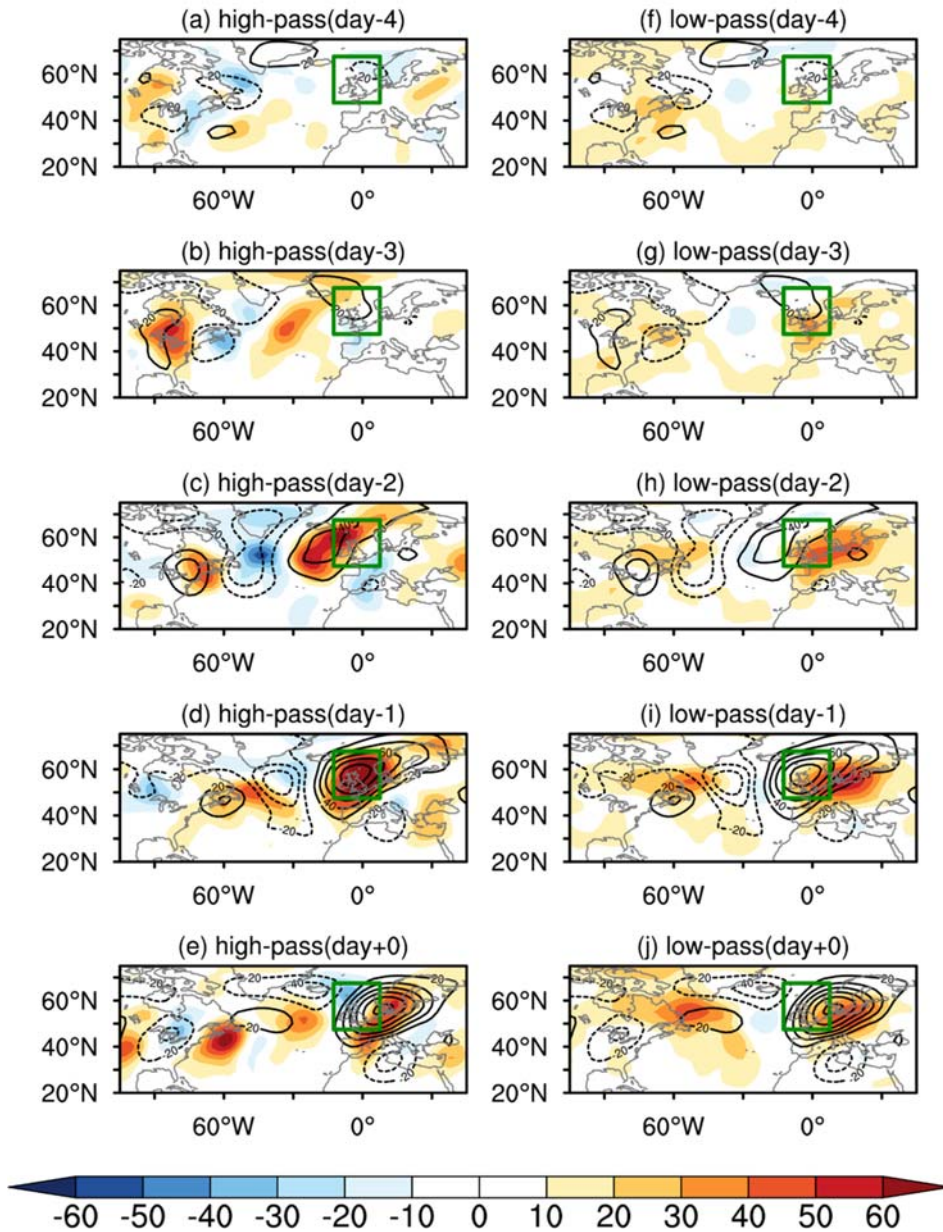

22

23 **Supplementary Figure. 4. Development of Euro-Atlantic blocking in the reanalysis.**

24 The daily composites of the 500-hPa geopotential height tendency (contours) and its  
25 contribution from the (a)–(e) high-frequency and (f)–(j) low-frequency component  
26 (shading) of the vorticity flux convergence from day–4 to day+0 of the Euro-Atlantic  
27 blocking events in the NCEP/NCAR reanalysis. Unit:  $m\ day^{-1}$ .

Euro-Atlantic blocking (45°-55°N, 10°W-10°E) : day -3 to -2

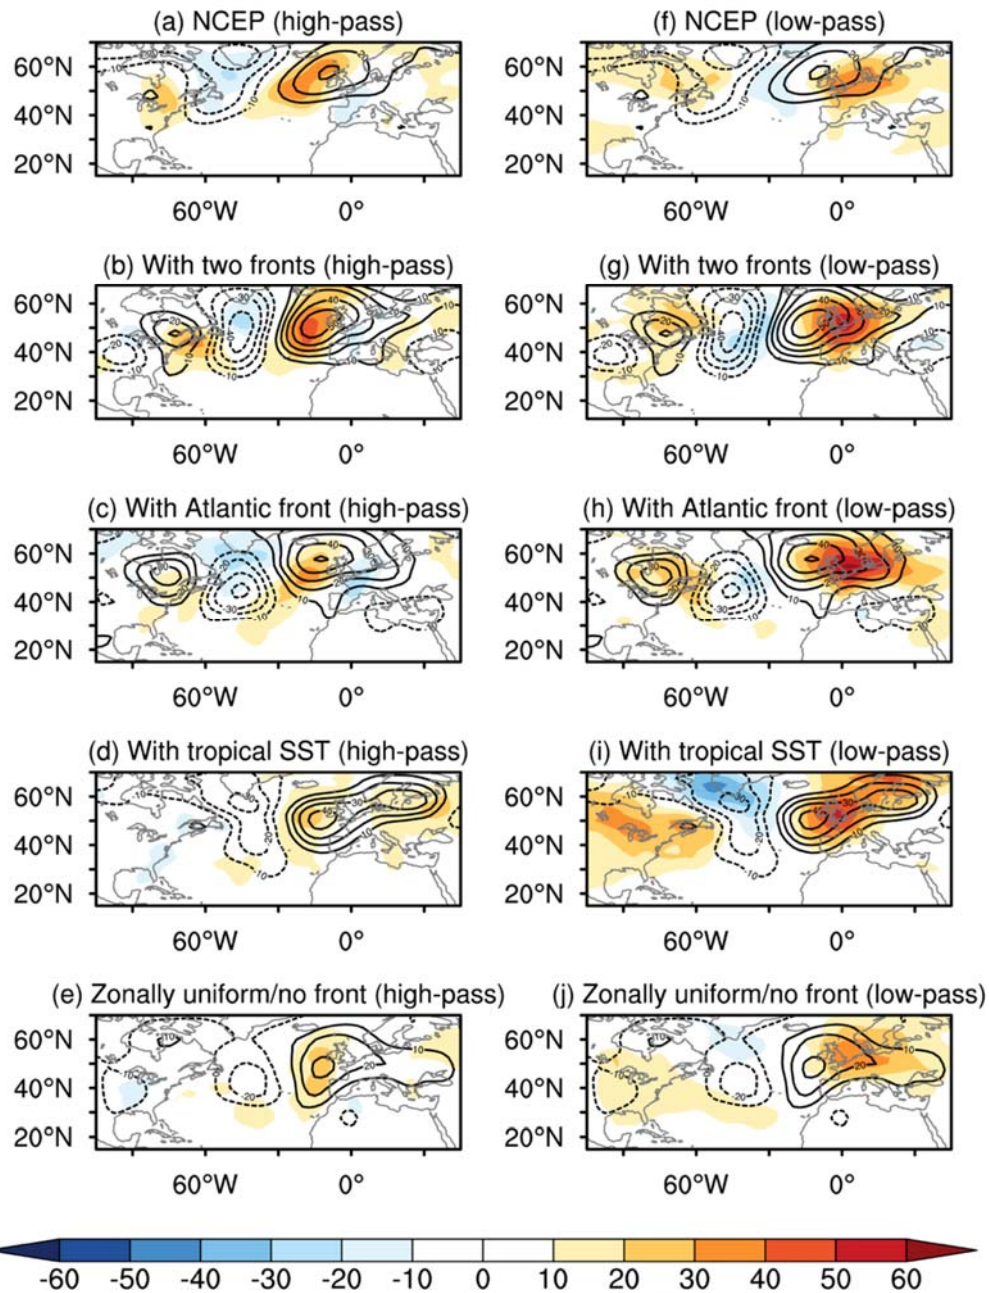

28

29 **Supplementary Figure 5. Major dynamic processes involved in the development**  
 30 **of Euro-Atlantic blocking in the reanalysis and different semi-idealised**  
 31 **experiments.** 500-hPa geopotential height tendency (contour interval: 30 *m*) and its  
 32 contribution from (a)–(e) high-frequency dynamics and (f)–(j) low-frequency dynamics  
 33 (shading: *m*) during day–3 to day–2 of Euro-Atlantic blocking (45°–55°N and 10°W–  
 34 10°E) in (a),(f) the NCEP/NCAR reanalysis, (b),(g) Atlantic and Pacific oceanic fronts  
 35 (EXT\_ALL run), (c),(h) Atlantic oceanic front (EXT\_ATL run), (d),(i) tropical SST  
 36 (TROP\_ALL run), and (e),(j) zonally uniform tropical SST/no fronts (ZUNF run).

Greenland blocking (60°-70°N, 60°-30°W)

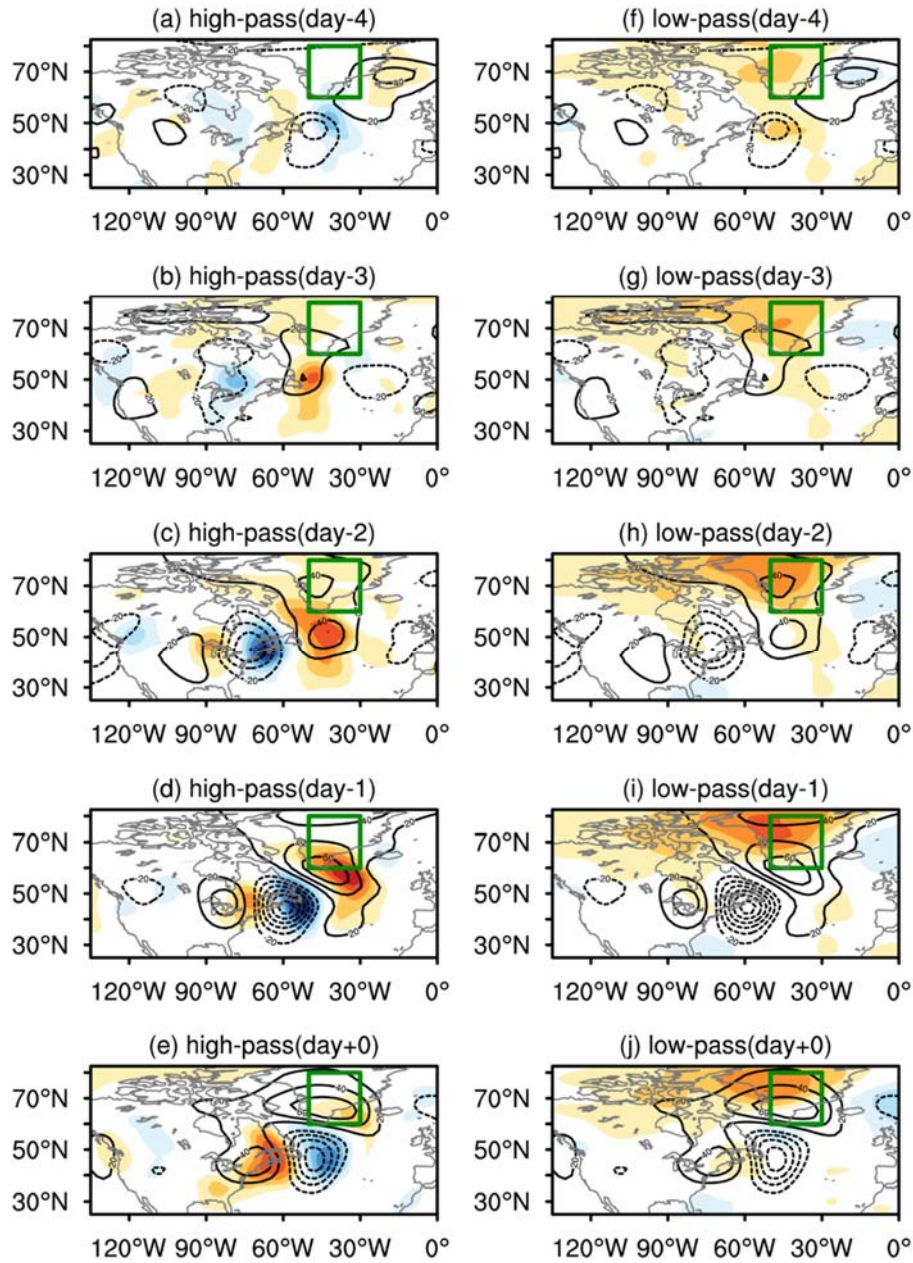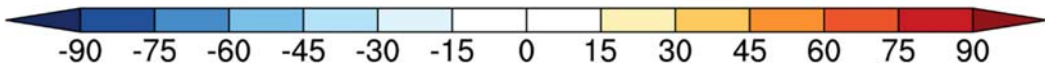

37  
38  
39  
40  
41  
42  
43

**Supplementary Figure. 6. Development of Euro-Atlantic blocking in the reanalysis.** The daily composites of the 500-hPa geopotential height tendency (contours) and its contribution from the (a)–(e) high-frequency and (f)–(j) low-frequency component (shading) of the vorticity flux convergence from day–4 to day+0 of the Greenland blocking events in NCEP/NCAR reanalysis. Unit:  $m \text{ day}^{-1}$ .

Greenland blocking (60°-70°N, 60°-30°W) : day -2 to -1

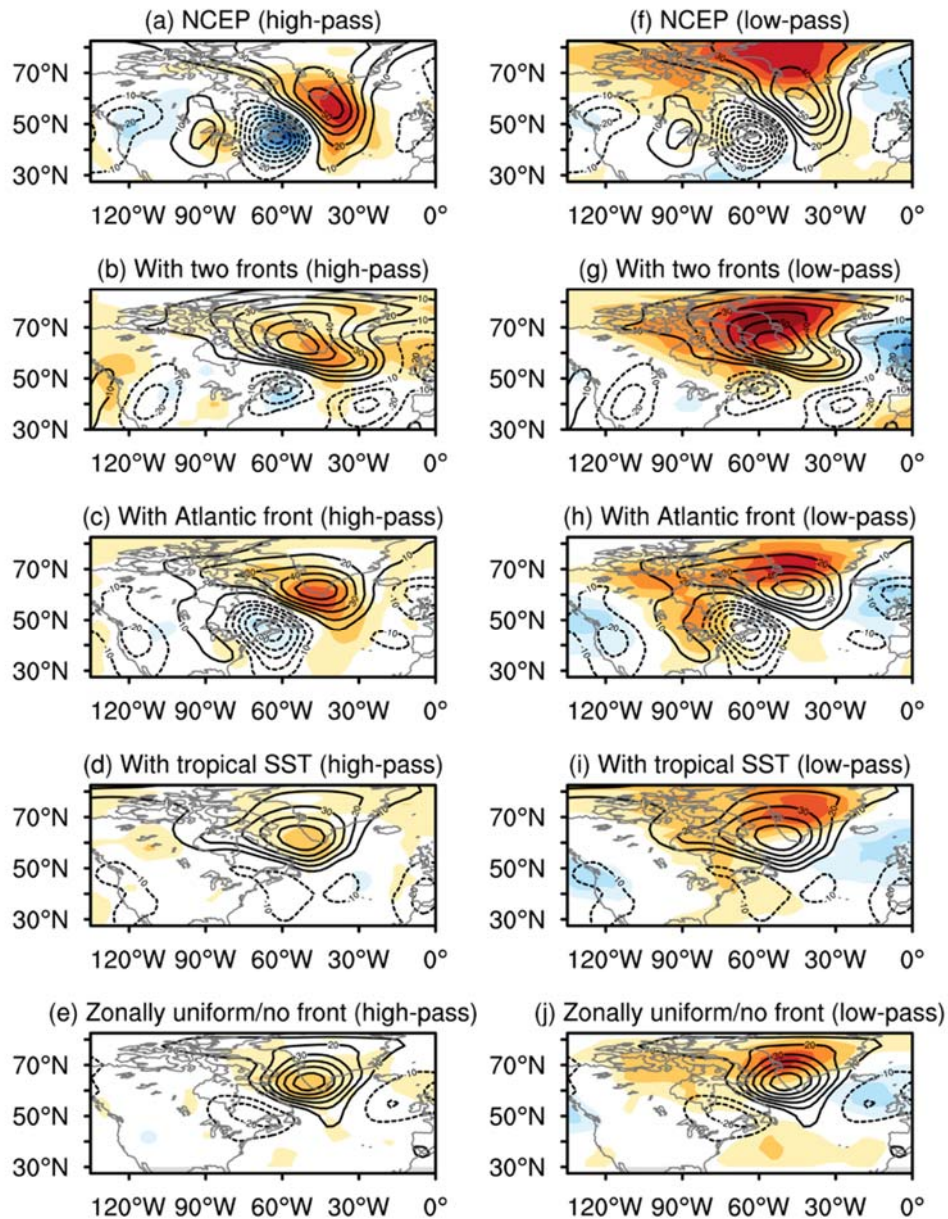

44

45

46

47

48

49

50

51

52

**Supplementary Figure. 7. Major dynamic processes involved in the development of Greenland blocking in the reanalysis and different semi-idealised experiments.** 500-hPa geopotential height tendency (contour interval: 30 m) and its contribution from (a)–(e) high-frequency dynamics and (f)–(j) low-frequency dynamics (shading: m) during day–3 to day–2 of Greenland blocking (60°–70°N and 60°–30°W) in (a),(f) the NCEP/NCAR reanalysis, (b),(g) Atlantic and Pacific oceanic fronts (EXT\_ALL run), (c),(h) Atlantic oceanic front (EXT\_ATL run), (d),(i) tropical SST (TROP\_ALL run), and (e),(j) zonally uniform tropical SST/no fronts (ZUNF run).



## 250-hPa geopotential height

(a) response to two oceanic fronts

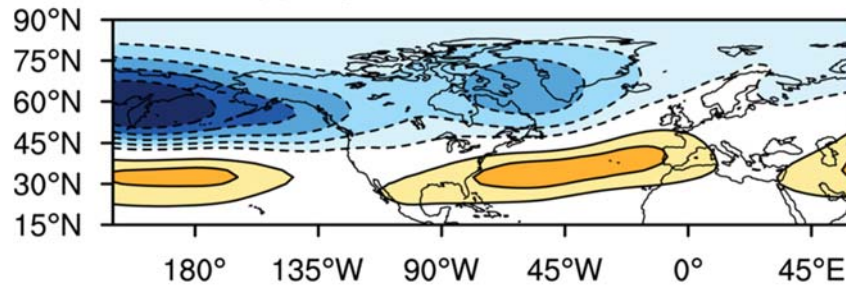

(b) response to Atlantic oceanic front

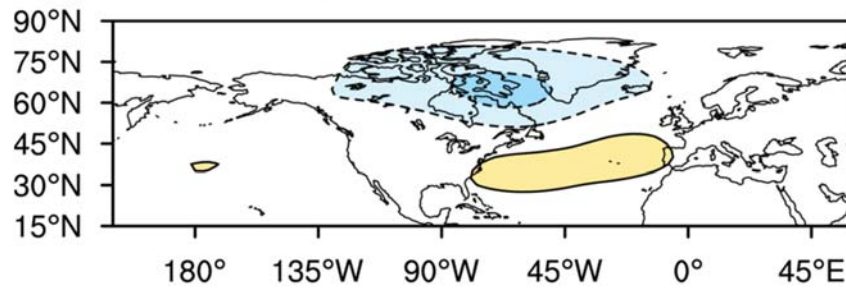

(c) response to Pacific oceanic front

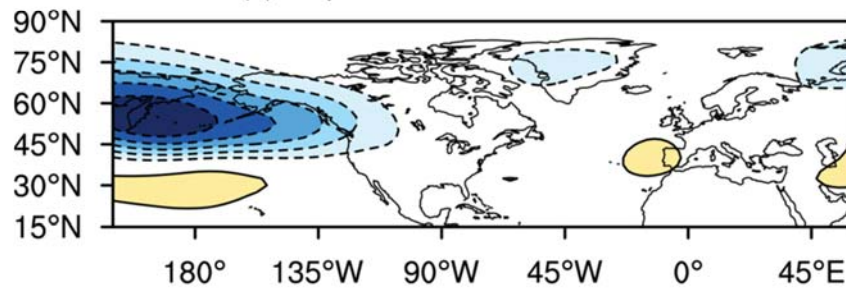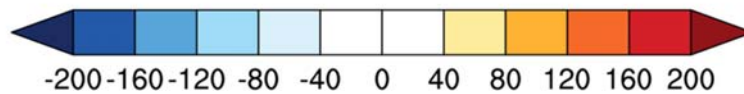

53

54 **Supplementary Figure. 8. Impacts of the oceanic fronts on the mean state.** The  
55 response of 250-hPa geopotential height to (a) Atlantic and Pacific oceanic fronts  
56 (EXT\_ALL run), (b) Atlantic oceanic front (EXT\_ATL run), (c) Pacific oceanic front  
57 (EXT\_PAC run). Unit: m.

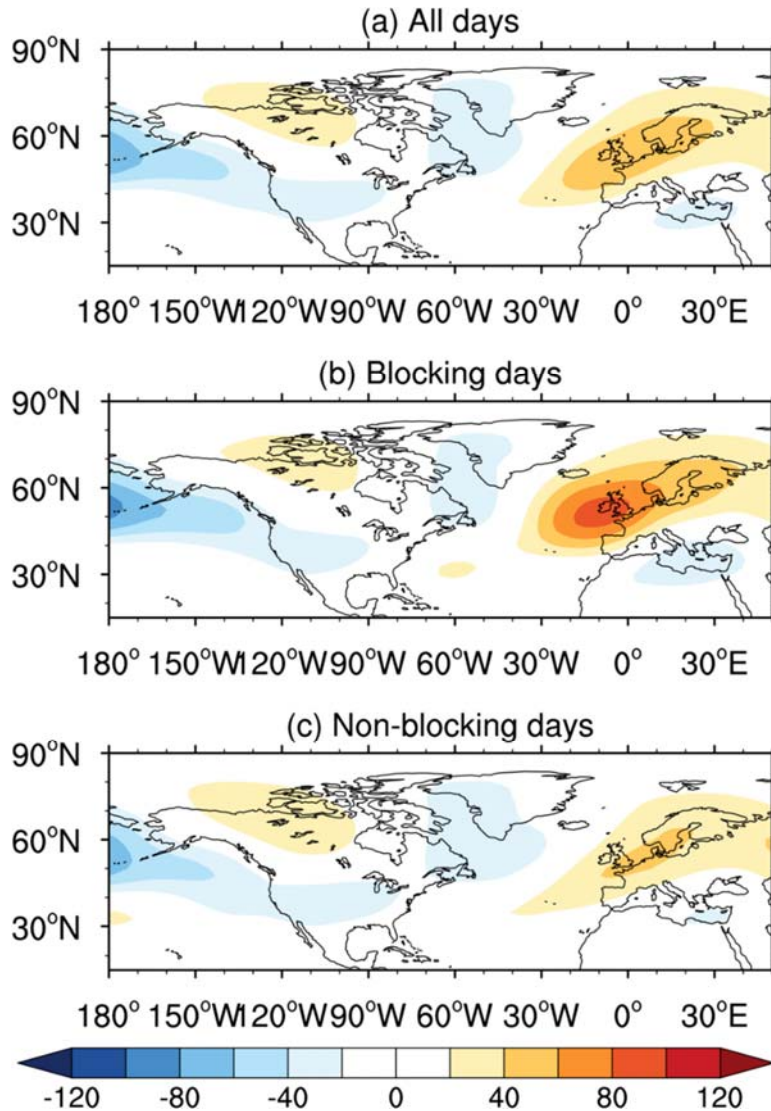

58

59 **Supplementary Figure. 9. Impacts of the oceanic fronts on the stationary**  
 60 **planetary-scale wave during blocking and non-blocking days.** Response of the  
 61 eddy-geopotential height to the co-existence of Atlantic and Pacific mid-latitude  
 62 oceanic fronts (EXT\_ALL run): (a) all DJF days, (b) blocking days, and (c) non-  
 63 non-blocking days. Here blocking days refer to day-7 to day+7 of blocking events occurring  
 64 within 45°-65°N and 30°W-30°E.

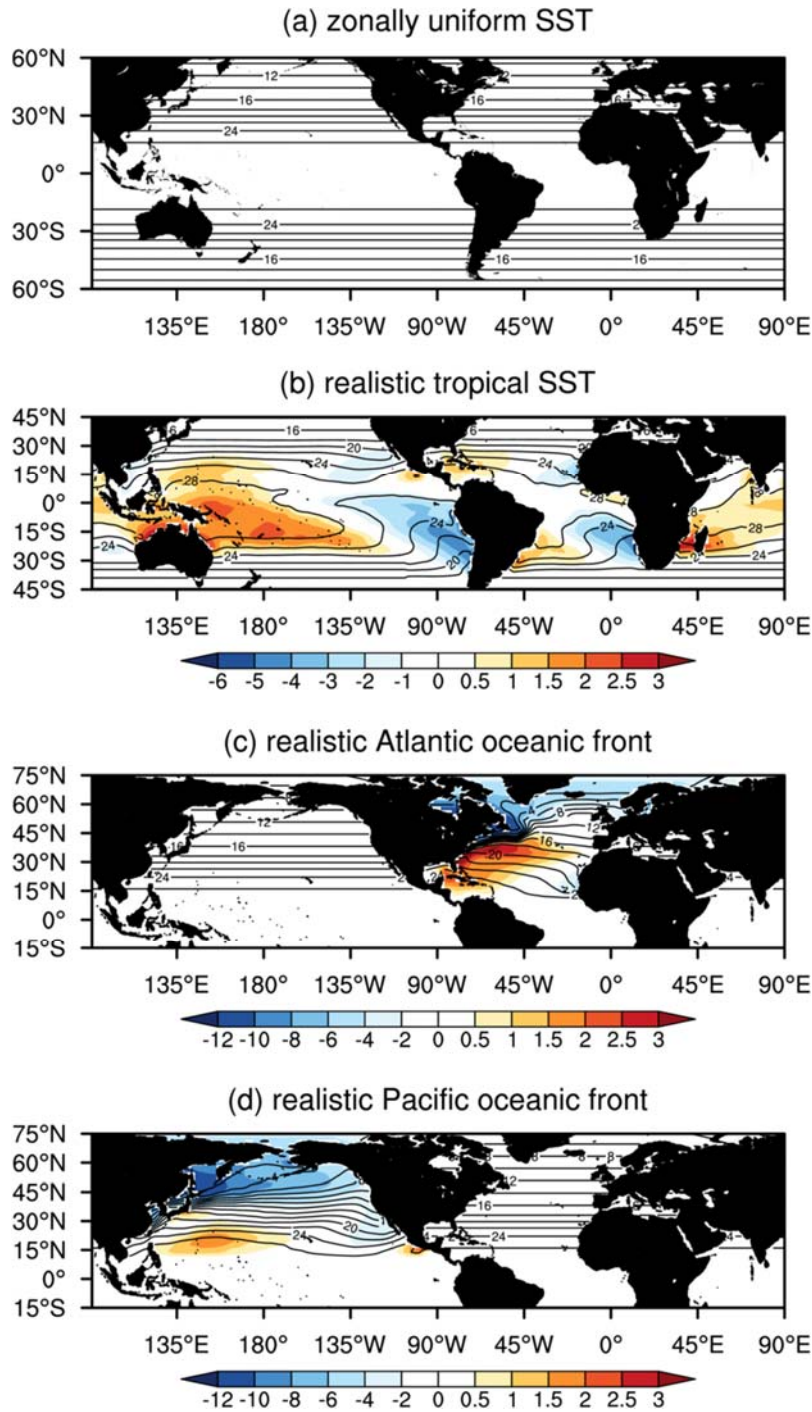

65

66 **Supplementary Figure 10. SST boundary conditions.** DJF-averaged SST boundary  
 67 condition (contour interval: 2°C) in (a) the ZUNF run (zonally uniform tropical SST,  
 68 no fronts), (b) the TROP\_ALL run (with realistic tropical SST), (c) the EXT\_ATL run  
 69 (with realistic extratropical Atlantic SST, i.e., with an Atlantic oceanic front), and (d)  
 70 the EXT\_PAC run (with realistic extratropical Pacific SST, i.e., with a Pacific oceanic  
 71 front). In (b)-(d), shading indicates the difference between the sensitivity experiment  
 72 and the ZUNF run. Unit: °C. Note the uneven color bar intervals.
